# Supplementary material for: Prevalence of Heterotrophic Methylmercury Detoxifying Bacteria across Oceanic Regions
Source: Environ Sci Technol. 2022 Mar 4;56(6):3452–61. doi: 10.1021/acs.est.1c05635 (PMC8928480; doi:10.1021/acs.est.1c05635)
Supplement: Supplementary file 1 — es1c05635_si_001.xlsx [file es1c05635_si_001.xlsx]

## Sheet: s1
Genome	Gene	Product name	Accession number JGI/IMG	merA or merB copy recognized by primers
Alteromonas australica DE70	merA	mercuric reductase	2641287926	Yes
Alteromonas macleodii "Ionian Sea U4"	merA	mercuric reductase	2562479772	No
Alteromonas macleodii "Ionian Sea U4"	merA	mercuric reductase	2562481625	Yes
Alteromonas macleodii "Ionian Sea U7"	merA	mercuric reductase	2555870883	No
Alteromonas macleodii "Ionian Sea U7"	merA	mercuric reductase	2555872780	Yes
Alteromonas macleodii "Ionian Sea U8"	merA	mercuric reductase	2555876690	Yes
Alteromonas macleodii "Ionian Sea U8"	merA	mercuric reductase	2555876691	No
Alteromonas macleodii "Ionian Sea U8"	merA	mercuric reductase	2555873984	Yes
Alteromonas macleodii "Ionian Sea UM4b"	merA	mercuric reductase	2555880574	Yes
Alteromonas macleodii "Ionian Sea UM7"	merA	mercuric reductase	2562485933	Yes
Alteromonas macleodii AltDE1	merA	mercuric reductase	2521941837	Yes
Alteromonas mediterranea DE	merA	mercuric ion reductase	642756398	Yes
Alteromonas mediterranea DE	merA	mercuric reductase	642754843	No
Alteromonas mediterranea DE	merA	mercuric reductase	642755479	Yes
Alteromonas mediterranea DE	merA	mercuric reductase	642755223	No
Alteromonas mediterranea DE	merB	organomercurial lyase	642756397	Yes
Marinobacter adherens HP15	merA	mercuric ion reductase	650412470	No
Marinobacter adherens HP15	merA	mercuric ion reductase	650409351	No
Marinobacter aquaeolei VT8	merA	mercuric reductase	639810186	No
Marinobacter aquaeolei VT8	merA	mercuric reductase	639809860	No
Marinobacter aquaeolei VT8 (Marinobacter hydrocarbonoclasticus VT8)	merA	mercuric reductase	639810198	Yes
Marinobacter aquaeolei VT8 (Marinobacter hydrocarbonoclasticus VT8)	merB	Alkylmercury lyase	639810199	Yes
Marinobacter hydrocarbonoclasticus ATCC 49840	merA	mercuric reductase	2540831379	No
Marinobacter salarius R9SW1	merA	mercuric reductase	2688335289	Yes
Marinobacter sp. BSs20148	merA	mercuric reductase	2518886541	No
Marinobacter sp. CP1	merA	mercuric reductase	2641792913	No
Marinobacter sp. CP1	merA	mercuric reductase	2641794344	No

## Sheet: s2
id_isolate	station	layer	genus	PCR results	Gene	Ocean	MIC tolerance (𝜇M)	BEST_HIT_16SrRNA_Reference	PERC_ID
85S_17	85_SRF	srf	Alteromonas	YES	Bad quality sequence	Antarctic Ocean	NA	2562485630_16S_ribosomal_RNA_Alteromonas_macleodii_Ionian_Sea_UM7_CP004853	99.811
85S_26	85_SRF	srf	Marinobacter	YES	Bad quality sequence	Antarctic Ocean	NA	640721717_16S_ribosomal_RNA_Marinobacter_aquaeolei_VT8_NC_008740	97.538
ST151RT_ISS_491	ST 151	srf	Alteromonas	YES	bad quality sequence	North Atlantic Ocean	NA	2562483368_16S_ribosomal_RNA_Alteromonas_macleodii_Ionian_Sea_UM7_CP004853	99.25
IM32RT_ISS197	ST 32	deep	Alteromonas	YES	Bad quality sequence	South Atlantic Ocean	NA	2562483368_16S_ribosomal_RNA_Alteromonas_macleodii_Ionian_Sea_UM7_CP004853	98.687
ST23RT_ISS_713	ST 23	deep	Alteromonas	YES	Bad quality sequence	South Atlantic Ocean	NA	2562483368_16S_ribosomal_RNA_Alteromonas_macleodii_Ionian_Sea_UM7_CP004853	99.25
ST72RT_ISS_601	ST 72	srf	Alteromonas	YES	Bad quality sequence	South Atlantic Ocean	NA	2562483368_16S_ribosomal_RNA_Alteromonas_macleodii_Ionian_Sea_UM7_CP004853	98.682
ST76RT_ISS_1169	ST 76	srf	Marinobacter	YES	bad quality sequence	South Atlantic Ocean	NA	2540829979_ribosomal_RNA_16S_Marinobacter_hydrocarbonoclasticus_ATCC_49840_FO203363	100
ST10RT_ISS_455	ST 10	deep	Marinobacter	YES	bad quality sequence (short)	North Atlantic Ocean	NA	2562483368_16S_ribosomal_RNA_Alteromonas_macleodii_Ionian_Sea_UM7_CP004853	98.895
85D_1	85_DCM	srf	Alteromonas	YES	merA	Antarctic Ocean	10	2562483368_16S_ribosomal_RNA_Alteromonas_macleodii_Ionian_Sea_UM7_CP004853	99.811
ST10RT_ISS_444	ST 10	deep	Alteromonas	YES	merA	North Atlantic Ocean	50	2562483368_16S_ribosomal_RNA_Alteromonas_macleodii_Ionian_Sea_UM7_CP004853	99.812
ST151RT_ISS_496	ST 151	srf	Alteromonas	YES	merA	North Atlantic Ocean	50	2562482999_16S_ribosomal_RNA_Alteromonas_macleodii_Ionian_Sea_UM7_CP004853	100
ST151RT_ISS_497	ST 151	srf	Alteromonas	YES	merA	North Atlantic Ocean	20	2562482999_16S_ribosomal_RNA_Alteromonas_macleodii_Ionian_Sea_UM7_CP004853	100
ST151RT_ISS_498	ST 151	srf	Alteromonas	YES	merA	North Atlantic Ocean	50	2562482999_16S_ribosomal_RNA_Alteromonas_macleodii_Ionian_Sea_UM7_CP004853	100
ST151RT_ISS_499	ST 151	srf	Alteromonas	YES	merA	North Atlantic Ocean	50	2562482999_16S_ribosomal_RNA_Alteromonas_macleodii_Ionian_Sea_UM7_CP004853	100
ST151RT_ISS_507	ST 151	srf	Alteromonas	YES	merA	North Atlantic Ocean	20	2562482999_16S_ribosomal_RNA_Alteromonas_macleodii_Ionian_Sea_UM7_CP004853	100
ST151RT_ISS_508	ST 151	srf	Alteromonas	YES	merA	North Atlantic Ocean	50	2562482999_16S_ribosomal_RNA_Alteromonas_macleodii_Ionian_Sea_UM7_CP004853	100
IDMED12C_ISS385	ST 8	deep	Marinobacter	YES	merA	NW Mediterranean Sea	10	2688337140_16S_rRNA._Bacterial_SSU_Marinobacter_salarius_R9SW1_Ga0133509_11	100
IDMED12C_ISS388	ST 8	deep	Marinobacter	YES	merA	NW Mediterranean Sea	20	2688337140_16S_rRNA._Bacterial_SSU_Marinobacter_salarius_R9SW1_Ga0133509_11	100
IDMED12C_ISS390	ST 8	deep	Marinobacter	YES	merA	NW Mediterranean Sea	20	2688337140_16S_rRNA._Bacterial_SSU_Marinobacter_salarius_R9SW1_Ga0133509_11	100
IDMED12C_ISS406	ST 8	deep	Marinobacter	YES	merA	NW Mediterranean Sea	20	2688337140_16S_rRNA._Bacterial_SSU_Marinobacter_salarius_R9SW1_Ga0133509_11	100
IDMED12C_ISS407	ST 8	deep	Marinobacter	YES	merA	NW Mediterranean Sea	20	2688337140_16S_rRNA._Bacterial_SSU_Marinobacter_salarius_R9SW1_Ga0133509_11	100
IDMED12C_ISS408	ST 8	deep	Marinobacter	YES	merA	NW Mediterranean Sea	20	2688337140_16S_rRNA._Bacterial_SSU_Marinobacter_salarius_R9SW1_Ga0133509_11	100
IDMED12C_ISS423	ST 8	deep	Marinobacter	YES	merA	NW Mediterranean Sea	20	2688337140_16S_rRNA._Bacterial_SSU_Marinobacter_salarius_R9SW1_Ga0133509_11	100
IDMEDRT_ISS350	ST 8	deep	Marinobacter	YES	merA	NW Mediterranean Sea	10	2688337140_16S_rRNA._Bacterial_SSU_Marinobacter_salarius_R9SW1_Ga0133509_11	100
IBSURF_RT_ISS068	IBSURF	srf	Alteromonas	YES	merA	NW Mediterranean Sea	20	2562485630_16S_ribosomal_RNA_Alteromonas_macleodii_Ionian_Sea_UM7_CP004853	99.055
IBSURF_RT_ISS158	IBSURF	srf	Alteromonas	YES	merA	NW Mediterranean Sea	20	2562482999_16S_ribosomal_RNA_Alteromonas_macleodii_Ionian_Sea_UM7_CP004853	100
ST17RT_ISS_836	ST 17	deep	Marinobacter	YES	merA	South Atlantic Ocean	20	2688337140_16S_rRNA._Bacterial_SSU_Marinobacter_salarius_R9SW1_Ga0133509_11	99.065
IM324C_ISS244	ST 32	deep	Alteromonas	YES	merA	South Atlantic Ocean	20	2562483368_16S_ribosomal_RNA_Alteromonas_macleodii_Ionian_Sea_UM7_CP004853	99.811
IM324C_ISS245	ST 32	deep	Alteromonas	YES	merA	South Atlantic Ocean	20	2562483368_16S_ribosomal_RNA_Alteromonas_macleodii_Ionian_Sea_UM7_CP004853	99.625
IM324C_ISS247	ST 32	deep	Alteromonas	YES	merA	South Atlantic Ocean	20	2562483368_16S_ribosomal_RNA_Alteromonas_macleodii_Ionian_Sea_UM7_CP004853	100
IM324C_ISS249	ST 32	deep	Alteromonas	YES	merA	South Atlantic Ocean	20	2562483368_16S_ribosomal_RNA_Alteromonas_macleodii_Ionian_Sea_UM7_CP004853	99.625
IM324C_ISS250	ST 32	deep	Alteromonas	YES	merA	South Atlantic Ocean	20	2562483368_16S_ribosomal_RNA_Alteromonas_macleodii_Ionian_Sea_UM7_CP004853	100
IM32RT_ISS167	ST 32	deep	Alteromonas	YES	merA	South Atlantic Ocean	20	2562483368_16S_ribosomal_RNA_Alteromonas_macleodii_Ionian_Sea_UM7_CP004853	99.625
IM32RT_ISS169	ST 32	deep	Alteromonas	YES	merA	South Atlantic Ocean	20	2562483368_16S_ribosomal_RNA_Alteromonas_macleodii_Ionian_Sea_UM7_CP004853	99.625
IM43RT_ISS263	ST 43	deep	Alteromonas	YES	merA	South Atlantic Ocean	50	2562483368_16S_ribosomal_RNA_Alteromonas_macleodii_Ionian_Sea_UM7_CP004853	99.055
IM43RT_ISS281	ST 43	deep	Alteromonas	YES	merA	South Atlantic Ocean	20	2562483368_16S_ribosomal_RNA_Alteromonas_macleodii_Ionian_Sea_UM7_CP004853	100
ST17RT_ISS_787	ST 17	deep	Alteromonas	YES	merA	South Atlantic Ocean	50	2562483368_16S_ribosomal_RNA_Alteromonas_macleodii_Ionian_Sea_UM7_CP004853	99.248
ST23RT_ISS_712	ST 23	deep	Alteromonas	YES	merA	South Atlantic Ocean	10	2562483368_16S_ribosomal_RNA_Alteromonas_macleodii_Ionian_Sea_UM7_CP004853	99.812
ST23RT_ISS_716	ST 23	deep	Alteromonas	YES	merA	South Atlantic Ocean	10	2562482999_16S_ribosomal_RNA_Alteromonas_macleodii_Ionian_Sea_UM7_CP004853	100
ST23RT_ISS_725	ST 23	deep	Alteromonas	YES	merA	South Atlantic Ocean	10	2562483368_16S_ribosomal_RNA_Alteromonas_macleodii_Ionian_Sea_UM7_CP004853	100
ST23RT_ISS_726	ST 23	deep	Alteromonas	YES	merA	South Atlantic Ocean	20	2562483368_16S_ribosomal_RNA_Alteromonas_macleodii_Ionian_Sea_UM7_CP004853	100
ST23RT_ISS_727	ST 23	deep	Alteromonas	YES	merA	South Atlantic Ocean	20	2562483368_16S_ribosomal_RNA_Alteromonas_macleodii_Ionian_Sea_UM7_CP004853	100
ST76RT_ISS_1144	ST 76	srf	Alteromonas	YES	merA	South Atlantic Ocean	20	2562483368_16S_ribosomal_RNA_Alteromonas_macleodii_Ionian_Sea_UM7_CP004853	99.812
ST76RT_ISS_1145	ST 76	srf	Alteromonas	YES	merA	South Atlantic Ocean	20	2562483368_16S_ribosomal_RNA_Alteromonas_macleodii_Ionian_Sea_UM7_CP004853	98.687
ST76RT_ISS_1146	ST 76	srf	Alteromonas	YES	merA	South Atlantic Ocean	20	2562483368_16S_ribosomal_RNA_Alteromonas_macleodii_Ionian_Sea_UM7_CP004853	99.812
ST76RT_ISS_1161	ST 76	srf	Alteromonas	YES	merA	South Atlantic Ocean	20	2562483368_16S_ribosomal_RNA_Alteromonas_macleodii_Ionian_Sea_UM7_CP004853	99.812
ST67RT_ISS_1254	ST 67	srf	Marinobacter	YES	merA	South Atlantic Ocean	20	2540829979_ribosomal_RNA_16S_Marinobacter_hydrocarbonoclasticus_ATCC_49840_FO203363	100
ST67RT_ISS_1255	ST 67	srf	Marinobacter	YES	merA	South Atlantic Ocean	20	2540829979_ribosomal_RNA_16S_Marinobacter_hydrocarbonoclasticus_ATCC_49840_FO203363	100
ST67RT_ISS_1261	ST 67	srf	Marinobacter	YES	merA	South Atlantic Ocean	50	2540829979_ribosomal_RNA_16S_Marinobacter_hydrocarbonoclasticus_ATCC_49840_FO203363	100
ST67RT_ISS_1267	ST 67	srf	Marinobacter	YES	merA	South Atlantic Ocean	50	2540829979_ribosomal_RNA_16S_Marinobacter_hydrocarbonoclasticus_ATCC_49840_FO203363	100
ST67RT_ISS_1275	ST 67	srf	Marinobacter	YES	merA	South Atlantic Ocean	50	2540829979_ribosomal_RNA_16S_Marinobacter_hydrocarbonoclasticus_ATCC_49840_FO203363	100
ST72RT_ISS_561	ST 72	srf	Marinobacter	YES	merA	South Atlantic Ocean	50	2540829979_ribosomal_RNA_16S_Marinobacter_hydrocarbonoclasticus_ATCC_49840_FO203363	100
ST72RT_ISS_635	ST 72	srf	Marinobacter	YES	merA	South Atlantic Ocean	10	2540829979_ribosomal_RNA_16S_Marinobacter_hydrocarbonoclasticus_ATCC_49840_FO203363	100
ST76RT_ISS_1165	ST 76	srf	Marinobacter	YES	merA	South Atlantic Ocean	50	2540829979_ribosomal_RNA_16S_Marinobacter_hydrocarbonoclasticus_ATCC_49840_FO203363	100
ST76RT_ISS_1166	ST 76	srf	Marinobacter	YES	merA	South Atlantic Ocean	25	2540829979_ribosomal_RNA_16S_Marinobacter_hydrocarbonoclasticus_ATCC_49840_FO203363	100
ST76RT_ISS_1168	ST 76	srf	Marinobacter	YES	merA	South Atlantic Ocean	20	2540829979_ribosomal_RNA_16S_Marinobacter_hydrocarbonoclasticus_ATCC_49840_FO203363	100
85S_12	85_SRF	srf	Marinobacter	YES	merA/merAB	Antarctic Ocean	10	2540829979_ribosomal_RNA_16S_Marinobacter_hydrocarbonoclasticus_ATCC_49840_FO203363	100
85S_15	85_SRF	srf	Marinobacter	YES	merA/merAB	Antarctic Ocean	20	2540829979_ribosomal_RNA_16S_Marinobacter_hydrocarbonoclasticus_ATCC_49840_FO203363	100
85S_6	85_SRF	srf	Marinobacter	YES	merA/merAB	Antarctic Ocean	10	2540829979_ribosomal_RNA_16S_Marinobacter_hydrocarbonoclasticus_ATCC_49840_FO203363	99.811
85S_8	85_SRF	srf	Marinobacter	YES	merA/merAB	Antarctic Ocean	5	2641791950_16S_rRNA._Bacterial_SSU_Marinobacter_sp._CP1_Ga0098240_11	100
IDMEDRT_ISS348	ST 8	deep	Marinobacter	YES	merA/merAB	NW Mediterranean Sea	20	640721717_16S_ribosomal_RNA_Marinobacter_aquaeolei_VT8_NC_008740	100
IM334C_ISS227	ST 43	deep	Alteromonas	YES	merA/merAB	South Atlantic Ocean	25	642753867_16S_ribosomal_RNA_Alteromonas_macleodii_Deep_ecotype_NC_011138	99.812
IM334C_ISS232	ST 43	deep	Alteromonas	YES	merA/merAB	South Atlantic Ocean	25	642753867_16S_ribosomal_RNA_Alteromonas_macleodii_Deep_ecotype_NC_011138	99.811
IM434C_ISS312	ST 43	deep	Alteromonas	YES	merA/merAB	South Atlantic Ocean	70	642753867_16S_ribosomal_RNA_Alteromonas_macleodii_Deep_ecotype_NC_011138	100
ST67RT_ISS_1253	ST 67	srf	Marinobacter	YES	merA/merAB	South Atlantic Ocean	20	2540829979_ribosomal_RNA_16S_Marinobacter_hydrocarbonoclasticus_ATCC_49840_FO203363	100
ST67RT_ISS_1256	ST 67	srf	Marinobacter	YES	merA/merAB	South Atlantic Ocean	50	2540829979_ribosomal_RNA_16S_Marinobacter_hydrocarbonoclasticus_ATCC_49840_FO203363	100
ST67RT_ISS_1260	ST 67	srf	Marinobacter	YES	merA/merAB	South Atlantic Ocean	50	2540829979_ribosomal_RNA_16S_Marinobacter_hydrocarbonoclasticus_ATCC_49840_FO203363	100
ST67RT_ISS_1263	ST 67	srf	Marinobacter	YES	merA/merAB	South Atlantic Ocean	50	640721717_16S_ribosomal_RNA_Marinobacter_aquaeolei_VT8_NC_008740	100
ST67RT_ISS_1266	ST 67	srf	Marinobacter	YES	merA/merAB	South Atlantic Ocean	50	640721717_16S_ribosomal_RNA_Marinobacter_aquaeolei_VT8_NC_008740	100
ST67RT_ISS_1278	ST 67	srf	Marinobacter	YES	merA/merAB	South Atlantic Ocean	20	2540829979_ribosomal_RNA_16S_Marinobacter_hydrocarbonoclasticus_ATCC_49840_FO203363	100
ST72RT_ISS_557	ST 72	srf	Marinobacter	YES	merA/merAB	South Atlantic Ocean	10	2540829979_ribosomal_RNA_16S_Marinobacter_hydrocarbonoclasticus_ATCC_49840_FO203363	100
ST72RT_ISS_634	ST 72	srf	Marinobacter	YES	merA/merAB	South Atlantic Ocean	50	640721717_16S_ribosomal_RNA_Marinobacter_aquaeolei_VT8_NC_008740	100
ST76RT_ISS_1172	ST 76	srf	Marinobacter	YES	merA/merAB	South Atlantic Ocean	20	2540829979_ribosomal_RNA_16S_Marinobacter_hydrocarbonoclasticus_ATCC_49840_FO203363	100
ST76RT_ISS_1182	ST 76	srf	Marinobacter	YES	merA/merAB	South Atlantic Ocean	20	2540829979_ribosomal_RNA_16S_Marinobacter_hydrocarbonoclasticus_ATCC_49840_FO203363	100
ST76RT_ISS_1183	ST 76	srf	Marinobacter	YES	merA/merAB	South Atlantic Ocean	20	2540829979_ribosomal_RNA_16S_Marinobacter_hydrocarbonoclasticus_ATCC_49840_FO203363	100
ST76RT_ISS_1184	ST 76	srf	Marinobacter	YES	merA/merAB	South Atlantic Ocean	20	2540829979_ribosomal_RNA_16S_Marinobacter_hydrocarbonoclasticus_ATCC_49840_FO203363	100
ST76RT_ISS_1185	ST 76	srf	Marinobacter	YES	merA/merAB	South Atlantic Ocean	20	2540829979_ribosomal_RNA_16S_Marinobacter_hydrocarbonoclasticus_ATCC_49840_FO203363	100
ST76RT_ISS_1186	ST 76	srf	Marinobacter	YES	merA/merAB	South Atlantic Ocean	20	2540829979_ribosomal_RNA_16S_Marinobacter_hydrocarbonoclasticus_ATCC_49840_FO203363	99.814
ST76RT_ISS_1187	ST 76	srf	Marinobacter	YES	merA/merAB	South Atlantic Ocean	20	2540829979_ribosomal_RNA_16S_Marinobacter_hydrocarbonoclasticus_ATCC_49840_FO203363	99.814
ST76RT_ISS_1354	ST 76	srf	Marinobacter	YES	merA/merAB	South Atlantic Ocean	20	2540829979_ribosomal_RNA_16S_Marinobacter_hydrocarbonoclasticus_ATCC_49840_FO203363	100
ST39DCMRT_013	ST 39	srf	Alteromonas	YES	merAB	Indian Ocean	NA	2562483368_16S_ribosomal_RNA_Alteromonas_macleodii_Ionian_Sea_UM7_CP004853	99.25
IDMEDRT_ISS347	ST 8	deep	Marinobacter	YES	merAB	NW Mediterranean Sea	20	2688337140_16S_rRNA._Bacterial_SSU_Marinobacter_salarius_R9SW1_Ga0133509_11	99.247
Artic_4C_11.1	AR_2	srf	Alteromonas	NO	NO GENE	Arctic Ocean	NA	2562485630_16S_ribosomal_RNA_Alteromonas_macleodii_Ionian_Sea_UM7_CP004853	99.812
Artic_4C_11.3	AR_2	srf	Alteromonas	NO	NO GENE	Arctic Ocean	NA	2562485630_16S_ribosomal_RNA_Alteromonas_macleodii_Ionian_Sea_UM7_CP004853	99.812
Artic_4C_DCM33	AR_2	srf	Alteromonas	NO	NO GENE	Arctic Ocean	NA	2562485630_16S_ribosomal_RNA_Alteromonas_macleodii_Ionian_Sea_UM7_CP004853	99.812
Artic_4C_DCM36	AR_2	srf	Alteromonas	NO	NO GENE	Arctic Ocean	NA	2562485630_16S_ribosomal_RNA_Alteromonas_macleodii_Ionian_Sea_UM7_CP004853	99.812
Artic_4C_SF19	AR_1	srf	Alteromonas	NO	NO GENE	Arctic Ocean	NA	2562485630_16S_ribosomal_RNA_Alteromonas_macleodii_Ionian_Sea_UM7_CP004853	99.811
Artic_4C_SF20	AR_1	srf	Alteromonas	NO	NO GENE	Arctic Ocean	NA	2562485630_16S_ribosomal_RNA_Alteromonas_macleodii_Ionian_Sea_UM7_CP004853	99.812
Artic_4C_SF7	AR_1	srf	Alteromonas	NO	NO GENE	Arctic Ocean	NA	2562485630_16S_ribosomal_RNA_Alteromonas_macleodii_Ionian_Sea_UM7_CP004853	99.811
ST39DCMRT_001	ST 39	srf	Alteromonas	NO	NO GENE	Indian Ocean	NA	2562483368_16S_ribosomal_RNA_Alteromonas_macleodii_Ionian_Sea_UM7_CP004853	99.25
ST39DCMRT_002	ST 39	srf	Alteromonas	NO	NO GENE	Indian Ocean	NA	MK801637.1_Aestuariibacter sp. strain 075	100
ST39DCMRT_003	ST 39	srf	Alteromonas	NO	NO GENE	Indian Ocean	NA	2562483368_16S_ribosomal_RNA_Alteromonas_macleodii_Ionian_Sea_UM7_CP004853	99.25
ST39DCMRT_004	ST 39	srf	Alteromonas	NO	NO GENE	Indian Ocean	NA	2562483368_16S_ribosomal_RNA_Alteromonas_macleodii_Ionian_Sea_UM7_CP004853	99.25
ST39DCMRT_005	ST 39	srf	Alteromonas	NO	NO GENE	Indian Ocean	NA	2562483368_16S_ribosomal_RNA_Alteromonas_macleodii_Ionian_Sea_UM7_CP004853	99.25
ST39DCMRT_006	ST 39	srf	Alteromonas	NO	NO GENE	Indian Ocean	NA	2562483368_16S_ribosomal_RNA_Alteromonas_macleodii_Ionian_Sea_UM7_CP004853	99.25
ST39DCMRT_007	ST 39	srf	Alteromonas	NO	NO GENE	Indian Ocean	NA	2562483368_16S_ribosomal_RNA_Alteromonas_macleodii_Ionian_Sea_UM7_CP004853	99.25
ST39DCMRT_008	ST 39	srf	Alteromonas	NO	NO GENE	Indian Ocean	NA	2562483368_16S_ribosomal_RNA_Alteromonas_macleodii_Ionian_Sea_UM7_CP004853	99.25
ST39DCMRT_009	ST 39	srf	Alteromonas	NO	NO GENE	Indian Ocean	NA	2562483368_16S_ribosomal_RNA_Alteromonas_macleodii_Ionian_Sea_UM7_CP004853	99.245
ST39DCMRT_011	ST 39	srf	Alteromonas	NO	NO GENE	Indian Ocean	NA	2562483368_16S_ribosomal_RNA_Alteromonas_macleodii_Ionian_Sea_UM7_CP004853	99.25
ST39DCMRT_012	ST 39	srf	Alteromonas	NO	NO GENE	Indian Ocean	NA	2562483368_16S_ribosomal_RNA_Alteromonas_macleodii_Ionian_Sea_UM7_CP004853	99.25
ST39DCMRT_015	ST 39	srf	Alteromonas	NO	NO GENE	Indian Ocean	NA	2562483368_16S_ribosomal_RNA_Alteromonas_macleodii_Ionian_Sea_UM7_CP004853	99.25
ST39DCMRT_016	ST 39	srf	Alteromonas	NO	NO GENE	Indian Ocean	NA	2562483368_16S_ribosomal_RNA_Alteromonas_macleodii_Ionian_Sea_UM7_CP004853	99.25
ST39DCMRT_017	ST 39	srf	Alteromonas	NO	NO GENE	Indian Ocean	NA	2562483368_16S_ribosomal_RNA_Alteromonas_macleodii_Ionian_Sea_UM7_CP004853	99.25
ST39DCMRT_018	ST 39	srf	Alteromonas	NO	NO GENE	Indian Ocean	NA	2562483368_16S_ribosomal_RNA_Alteromonas_macleodii_Ionian_Sea_UM7_CP004853	99.25
ST39DCMRT_020	ST 39	srf	Alteromonas	NO	NO GENE	Indian Ocean	NA	2562483368_16S_ribosomal_RNA_Alteromonas_macleodii_Ionian_Sea_UM7_CP004853	99.25
ST39DCMRT_021	ST 39	srf	Alteromonas	NO	NO GENE	Indian Ocean	NA	2562483368_16S_ribosomal_RNA_Alteromonas_macleodii_Ionian_Sea_UM7_CP004853	99.245
ST39DCMRT_022	ST 39	srf	Alteromonas	NO	NO GENE	Indian Ocean	NA	2562483368_16S_ribosomal_RNA_Alteromonas_macleodii_Ionian_Sea_UM7_CP004853	99.25
ST39DCMRT_023	ST 39	srf	Alteromonas	NO	NO GENE	Indian Ocean	NA	2562483368_16S_ribosomal_RNA_Alteromonas_macleodii_Ionian_Sea_UM7_CP004853	99.25
ST39DCMRT_024	ST 39	srf	Alteromonas	NO	NO GENE	Indian Ocean	NA	2562483368_16S_ribosomal_RNA_Alteromonas_macleodii_Ionian_Sea_UM7_CP004853	99.25
ST39DCMRT_025	ST 39	srf	Alteromonas	NO	NO GENE	Indian Ocean	NA	2562483368_16S_ribosomal_RNA_Alteromonas_macleodii_Ionian_Sea_UM7_CP004853	99.25
ST39DCMRT_026	ST 39	srf	Alteromonas	NO	NO GENE	Indian Ocean	NA	2562483368_16S_ribosomal_RNA_Alteromonas_macleodii_Ionian_Sea_UM7_CP004853	99.25
ST39DCMRT_027	ST 39	srf	Alteromonas	NO	NO GENE	Indian Ocean	NA	2562483368_16S_ribosomal_RNA_Alteromonas_macleodii_Ionian_Sea_UM7_CP004853	99.248
ST39DCMRT_028	ST 39	srf	Alteromonas	NO	NO GENE	Indian Ocean	NA	2562483368_16S_ribosomal_RNA_Alteromonas_macleodii_Ionian_Sea_UM7_CP004853	99.25
ST39DCMRT_029	ST 39	srf	Alteromonas	NO	NO GENE	Indian Ocean	NA	MK801637.1_Aestuariibacter sp. strain 075	100
ST39DCMRT_030	ST 39	srf	Alteromonas	NO	NO GENE	Indian Ocean	NA	2562483368_16S_ribosomal_RNA_Alteromonas_macleodii_Ionian_Sea_UM7_CP004853	99.217
ST39DCMRT_031	ST 39	srf	Alteromonas	NO	NO GENE	Indian Ocean	NA	2562483368_16S_ribosomal_RNA_Alteromonas_macleodii_Ionian_Sea_UM7_CP004853	99.25
ST39DCMRT_032	ST 39	srf	Alteromonas	NO	NO GENE	Indian Ocean	NA	2562483368_16S_ribosomal_RNA_Alteromonas_macleodii_Ionian_Sea_UM7_CP004853	99.25
ST39DCMRT_033	ST 39	srf	Alteromonas	NO	NO GENE	Indian Ocean	NA	2562483368_16S_ribosomal_RNA_Alteromonas_macleodii_Ionian_Sea_UM7_CP004853	99.25
ST39DCMRT_035	ST 39	srf	Alteromonas	NO	NO GENE	Indian Ocean	NA	2562483368_16S_ribosomal_RNA_Alteromonas_macleodii_Ionian_Sea_UM7_CP004853	99.25
ST39DCMRT_038	ST 39	srf	Alteromonas	NO	NO GENE	Indian Ocean	NA	2562483368_16S_ribosomal_RNA_Alteromonas_macleodii_Ionian_Sea_UM7_CP004853	99.25
ST39DCMRT_039	ST 39	srf	Alteromonas	NO	NO GENE	Indian Ocean	NA	2562483368_16S_ribosomal_RNA_Alteromonas_macleodii_Ionian_Sea_UM7_CP004853	99.25
ST39DCMRT_040	ST 39	srf	Alteromonas	NO	NO GENE	Indian Ocean	NA	2562483368_16S_ribosomal_RNA_Alteromonas_macleodii_Ionian_Sea_UM7_CP004853	99.25
ST39DCMRT_042	ST 39	srf	Alteromonas	NO	NO GENE	Indian Ocean	NA	2562483368_16S_ribosomal_RNA_Alteromonas_macleodii_Ionian_Sea_UM7_CP004853	99.25
ST39DCMRT_044	ST 39	srf	Alteromonas	NO	NO GENE	Indian Ocean	NA	2562483368_16S_ribosomal_RNA_Alteromonas_macleodii_Ionian_Sea_UM7_CP004853	99.25
ST39DCMRT_045	ST 39	srf	Alteromonas	NO	NO GENE	Indian Ocean	NA	2562483368_16S_ribosomal_RNA_Alteromonas_macleodii_Ionian_Sea_UM7_CP004853	99.25
ST39DCMRT_046	ST 39	srf	Alteromonas	NO	NO GENE	Indian Ocean	NA	2562483368_16S_ribosomal_RNA_Alteromonas_macleodii_Ionian_Sea_UM7_CP004853	99.248
ST39DCMRT_049	ST 39	srf	Alteromonas	NO	NO GENE	Indian Ocean	NA	2562483368_16S_ribosomal_RNA_Alteromonas_macleodii_Ionian_Sea_UM7_CP004853	99.25
ST39DCMRT_051	ST 39	srf	Alteromonas	NO	NO GENE	Indian Ocean	NA	2562483368_16S_ribosomal_RNA_Alteromonas_macleodii_Ionian_Sea_UM7_CP004853	99.25
ST39DCMRT_241	ST 39	srf	Alteromonas	NO	NO GENE	Indian Ocean	NA	2562483368_16S_ribosomal_RNA_Alteromonas_macleodii_Ionian_Sea_UM7_CP004853	99.25
ST39DCMRT_247	ST 39	srf	Alteromonas	NO	NO GENE	Indian Ocean	20	2562483368_16S_ribosomal_RNA_Alteromonas_macleodii_Ionian_Sea_UM7_CP004853	99.248
ST39DCMRT_O47	ST 39	srf	Alteromonas	NO	NO GENE	Indian Ocean	NA	2562483368_16S_ribosomal_RNA_Alteromonas_macleodii_Ionian_Sea_UM7_CP004853	99.25
ST10RT_ISS_440	ST 10	deep	Alteromonas	NO	NO GENE	North Atlantic Ocean	NA	2562483368_16S_ribosomal_RNA_Alteromonas_macleodii_Ionian_Sea_UM7_CP004853	99.223
ST10RT_ISS_441	ST 10	deep	Alteromonas	NO	NO GENE	North Atlantic Ocean	NA	2562483368_16S_ribosomal_RNA_Alteromonas_macleodii_Ionian_Sea_UM7_CP004853	99.248
ST10RT_ISS_442	ST 10	deep	Alteromonas	NO	NO GENE	North Atlantic Ocean	NA	2562483368_16S_ribosomal_RNA_Alteromonas_macleodii_Ionian_Sea_UM7_CP004853	99.25
ST10RT_ISS_443	ST 10	deep	Alteromonas	NO	NO GENE	North Atlantic Ocean	NA	2562483368_16S_ribosomal_RNA_Alteromonas_macleodii_Ionian_Sea_UM7_CP004853	99.811
ST10RT_ISS_447	ST 10	deep	Alteromonas	NO	NO GENE	North Atlantic Ocean	NA	2562483368_16S_ribosomal_RNA_Alteromonas_macleodii_Ionian_Sea_UM7_CP004853	99.25
ST10RT_ISS_448	ST 10	deep	Alteromonas	NO	NO GENE	North Atlantic Ocean	NA	2562483368_16S_ribosomal_RNA_Alteromonas_macleodii_Ionian_Sea_UM7_CP004853	99.247
ST10RT_ISS_449	ST 10	deep	Alteromonas	NO	NO GENE	North Atlantic Ocean	NA	2562483368_16S_ribosomal_RNA_Alteromonas_macleodii_Ionian_Sea_UM7_CP004853	99.247
ST10RT_ISS_450	ST 10	deep	Alteromonas	NO	NO GENE	North Atlantic Ocean	NA	2562483368_16S_ribosomal_RNA_Alteromonas_macleodii_Ionian_Sea_UM7_CP004853	99.247
ST151RT_ISS_460	ST 151	srf	Alteromonas	NO	NO GENE	North Atlantic Ocean	NA	2562483368_16S_ribosomal_RNA_Alteromonas_macleodii_Ionian_Sea_UM7_CP004853	99.25
ST151RT_ISS_461	ST 151	srf	Alteromonas	NO	NO GENE	North Atlantic Ocean	NA	2562483368_16S_ribosomal_RNA_Alteromonas_macleodii_Ionian_Sea_UM7_CP004853	100
ST151RT_ISS_463	ST 151	srf	Alteromonas	NO	NO GENE	North Atlantic Ocean	NA	2562483368_16S_ribosomal_RNA_Alteromonas_macleodii_Ionian_Sea_UM7_CP004853	99.25
ST151RT_ISS_464	ST 151	srf	Alteromonas	NO	NO GENE	North Atlantic Ocean	NA	2562483368_16S_ribosomal_RNA_Alteromonas_macleodii_Ionian_Sea_UM7_CP004853	99.25
ST151RT_ISS_466	ST 151	srf	Alteromonas	NO	NO GENE	North Atlantic Ocean	NA	2562482999_16S_ribosomal_RNA_Alteromonas_macleodii_Ionian_Sea_UM7_CP004853	100
ST151RT_ISS_473	ST 151	srf	Alteromonas	NO	NO GENE	North Atlantic Ocean	NA	2562482999_16S_ribosomal_RNA_Alteromonas_macleodii_Ionian_Sea_UM7_CP004853	100
ST151RT_ISS_474	ST 151	srf	Alteromonas	NO	NO GENE	North Atlantic Ocean	NA	2562483368_16S_ribosomal_RNA_Alteromonas_macleodii_Ionian_Sea_UM7_CP004853	100
ST151RT_ISS_476	ST 151	srf	Alteromonas	NO	NO GENE	North Atlantic Ocean	NA	2562483368_16S_ribosomal_RNA_Alteromonas_macleodii_Ionian_Sea_UM7_CP004853	99.25
ST151RT_ISS_492	ST 151	srf	Alteromonas	NO	NO GENE	North Atlantic Ocean	NA	2562483368_16S_ribosomal_RNA_Alteromonas_macleodii_Ionian_Sea_UM7_CP004853	99.245
ST151RT_ISS_493	ST 151	srf	Alteromonas	NO	NO GENE	North Atlantic Ocean	NA	2562483368_16S_ribosomal_RNA_Alteromonas_macleodii_Ionian_Sea_UM7_CP004853	98.113
ST151RT_ISS_500	ST 151	srf	Alteromonas	NO	NO GENE	North Atlantic Ocean	NA	2562483368_16S_ribosomal_RNA_Alteromonas_macleodii_Ionian_Sea_UM7_CP004853	100
ST151RT_ISS_501	ST 151	srf	Alteromonas	NO	NO GENE	North Atlantic Ocean	NA	2562483368_16S_ribosomal_RNA_Alteromonas_macleodii_Ionian_Sea_UM7_CP004853	100
ST151RT_ISS_502	ST 151	srf	Alteromonas	NO	NO GENE	North Atlantic Ocean	NA	2562483368_16S_ribosomal_RNA_Alteromonas_macleodii_Ionian_Sea_UM7_CP004853	100
ST151RT_ISS_503	ST 151	srf	Alteromonas	NO	NO GENE	North Atlantic Ocean	NA	2562483368_16S_ribosomal_RNA_Alteromonas_macleodii_Ionian_Sea_UM7_CP004853	100
ST151RT_ISS_504	ST 151	srf	Alteromonas	NO	NO GENE	North Atlantic Ocean	NA	2562483368_16S_ribosomal_RNA_Alteromonas_macleodii_Ionian_Sea_UM7_CP004853	99.25
ST151RT_ISS_506	ST 151	srf	Alteromonas	NO	NO GENE	North Atlantic Ocean	NA	2562483368_16S_ribosomal_RNA_Alteromonas_macleodii_Ionian_Sea_UM7_CP004853	99.25
ST151RT_ISS_510	ST 151	srf	Alteromonas	NO	NO GENE	North Atlantic Ocean	NA	2562482999_16S_ribosomal_RNA_Alteromonas_macleodii_Ionian_Sea_UM7_CP004853	100
ST151RT_ISS_513	ST 151	srf	Alteromonas	NO	NO GENE	North Atlantic Ocean	NA	2562483368_16S_ribosomal_RNA_Alteromonas_macleodii_Ionian_Sea_UM7_CP004853	100
ST151RT_ISS_514	ST 151	srf	Alteromonas	NO	NO GENE	North Atlantic Ocean	NA	2562483368_16S_ribosomal_RNA_Alteromonas_macleodii_Ionian_Sea_UM7_CP004853	100
ST151RT_ISS_521	ST 151	srf	Alteromonas	NO	NO GENE	North Atlantic Ocean	NA	2562483368_16S_ribosomal_RNA_Alteromonas_macleodii_Ionian_Sea_UM7_CP004853	99.25
ST151RT_ISS_525	ST 151	srf	Alteromonas	NO	NO GENE	North Atlantic Ocean	NA	2562483368_16S_ribosomal_RNA_Alteromonas_macleodii_Ionian_Sea_UM7_CP004853	99.25
ST151RT_ISS_527	ST 151	srf	Alteromonas	NO	NO GENE	North Atlantic Ocean	NA	2562483368_16S_ribosomal_RNA_Alteromonas_macleodii_Ionian_Sea_UM7_CP004853	99.25
ST151RT_ISS_528	ST 151	srf	Alteromonas	NO	NO GENE	North Atlantic Ocean	NA	2562483368_16S_ribosomal_RNA_Alteromonas_macleodii_Ionian_Sea_UM7_CP004853	99.25
ST151RT_ISS_529	ST 151	srf	Alteromonas	NO	NO GENE	North Atlantic Ocean	NA	2562483368_16S_ribosomal_RNA_Alteromonas_macleodii_Ionian_Sea_UM7_CP004853	99.247
ST10RT_ISS_452	ST 10	deep	Marinobacter	NO	NO GENE	North Atlantic Ocean	NA	2688337140_16S_rRNA._Bacterial_SSU_Marinobacter_salarius_R9SW1_Ga0133509_11	99.057
IDMED12C_392	ST 8	deep	Alteromonas	NO	NO GENE	NW Mediterranean Sea	NA	2562483368_16S_ribosomal_RNA_Alteromonas_macleodii_Ionian_Sea_UM7_CP004853	99.25
IDMED12C_393	ST 8	deep	Alteromonas	NO	NO GENE	NW Mediterranean Sea	NA	2562483368_16S_ribosomal_RNA_Alteromonas_macleodii_Ionian_Sea_UM7_CP004853	99.251
IDMED12C_394	ST 8	deep	Alteromonas	NO	NO GENE	NW Mediterranean Sea	NA	2562483368_16S_ribosomal_RNA_Alteromonas_macleodii_Ionian_Sea_UM7_CP004853	99.251
IDMED12C_395	ST 8	deep	Alteromonas	NO	NO GENE	NW Mediterranean Sea	NA	2562483368_16S_ribosomal_RNA_Alteromonas_macleodii_Ionian_Sea_UM7_CP004853	99.25
IDMED12C_396	ST 8	deep	Alteromonas	NO	nO GENE	NW Mediterranean Sea	NA	2562483368_16S_ribosomal_RNA_Alteromonas_macleodii_Ionian_Sea_UM7_CP004853	99.251
IDMED12C_397	ST 8	deep	Alteromonas	NO	NO GENE	NW Mediterranean Sea	NA	2562483368_16S_ribosomal_RNA_Alteromonas_macleodii_Ionian_Sea_UM7_CP004853	99.25
IDMED12C_398	ST 8	deep	Alteromonas	NO	NO GENE	NW Mediterranean Sea	NA	2562483368_16S_ribosomal_RNA_Alteromonas_macleodii_Ionian_Sea_UM7_CP004853	99.251
IDMED12C_399	ST 8	deep	Alteromonas	NO	NO GENE	NW Mediterranean Sea	NA	2562483368_16S_ribosomal_RNA_Alteromonas_macleodii_Ionian_Sea_UM7_CP004853	99.25
IDMED12C_401	ST 8	deep	Alteromonas	NO	NO GENE	NW Mediterranean Sea	NA	2562483368_16S_ribosomal_RNA_Alteromonas_macleodii_Ionian_Sea_UM7_CP004853	99.25
IDMED12C_402	ST 8	deep	Alteromonas	NO	NO GENE	NW Mediterranean Sea	NA	2562483368_16S_ribosomal_RNA_Alteromonas_macleodii_Ionian_Sea_UM7_CP004853	99.25
IDMED12C_403	ST 8	deep	Alteromonas	NO	NO GENE	NW Mediterranean Sea	NA	2562483368_16S_ribosomal_RNA_Alteromonas_macleodii_Ionian_Sea_UM7_CP004853	99.25
IDMED12C_405	ST 8	deep	Alteromonas	NO	NO GENE	NW Mediterranean Sea	NA	2562483368_16S_ribosomal_RNA_Alteromonas_macleodii_Ionian_Sea_UM7_CP004853	99.25
IDMED12C_406	ST 8	deep	Alteromonas	NO	NO GENE	NW Mediterranean Sea	NA	2562483368_16S_ribosomal_RNA_Alteromonas_macleodii_Ionian_Sea_UM7_CP004853	99.25
IDMED12C_407	ST 8	deep	Alteromonas	NO	NO GENE	NW Mediterranean Sea	NA	2562483368_16S_ribosomal_RNA_Alteromonas_macleodii_Ionian_Sea_UM7_CP004853	99.251
IDMED12C_408	ST 8	deep	Alteromonas	NO	NO GENE	NW Mediterranean Sea	NA	2562483368_16S_ribosomal_RNA_Alteromonas_macleodii_Ionian_Sea_UM7_CP004853	99.251
IDMED12C_409	ST 8	deep	Alteromonas	NO	NO GENE	NW Mediterranean Sea	NA	2562483368_16S_ribosomal_RNA_Alteromonas_macleodii_Ionian_Sea_UM7_CP004853	99.25
IDMED12C_410	ST 8	deep	Alteromonas	NO	NO GENE	NW Mediterranean Sea	NA	2562483368_16S_ribosomal_RNA_Alteromonas_macleodii_Ionian_Sea_UM7_CP004853	99.25
IDMED12C_411	ST 8	deep	Alteromonas	NO	NO GENE	NW Mediterranean Sea	NA	2562483368_16S_ribosomal_RNA_Alteromonas_macleodii_Ionian_Sea_UM7_CP004853	99.251
IDMED12C_412	ST 8	deep	Alteromonas	NO	NO GENE	NW Mediterranean Sea	NA	2562483368_16S_ribosomal_RNA_Alteromonas_macleodii_Ionian_Sea_UM7_CP004853	99.25
IDMED12C_413	ST 8	deep	Alteromonas	NO	NO GENE	NW Mediterranean Sea	NA	2562483368_16S_ribosomal_RNA_Alteromonas_macleodii_Ionian_Sea_UM7_CP004853	99.25
IDMED12C_414	ST 8	deep	Alteromonas	NO	NO GENE	NW Mediterranean Sea	NA	2562483368_16S_ribosomal_RNA_Alteromonas_macleodii_Ionian_Sea_UM7_CP004853	98.895
IDMED12C_415	ST 8	deep	Alteromonas	NO	NO GENE	NW Mediterranean Sea	NA	2562483368_16S_ribosomal_RNA_Alteromonas_macleodii_Ionian_Sea_UM7_CP004853	98.895
IDMED12C_416	ST 8	deep	Alteromonas	NO	NO GENE	NW Mediterranean Sea	NA	2562483368_16S_ribosomal_RNA_Alteromonas_macleodii_Ionian_Sea_UM7_CP004853	98.895
IDMED12C_417	ST 8	deep	Alteromonas	NO	NO GENE	NW Mediterranean Sea	NA	2562483368_16S_ribosomal_RNA_Alteromonas_macleodii_Ionian_Sea_UM7_CP004853	99.251
IDMED12C_418	ST 8	deep	Alteromonas	NO	NO GENE	NW Mediterranean Sea	NA	2562483368_16S_ribosomal_RNA_Alteromonas_macleodii_Ionian_Sea_UM7_CP004853	99.25
IDMED12C_419	ST 8	deep	Alteromonas	NO	NO GENE	NW Mediterranean Sea	NA	2562483368_16S_ribosomal_RNA_Alteromonas_macleodii_Ionian_Sea_UM7_CP004853	99.25
IDMED12C_420	ST 8	deep	Alteromonas	NO	NO GENE	NW Mediterranean Sea	NA	2562483368_16S_ribosomal_RNA_Alteromonas_macleodii_Ionian_Sea_UM7_CP004853	99.251
IDMED12C_422	ST 8	deep	Alteromonas	NO	NO GENE	NW Mediterranean Sea	NA	2562483368_16S_ribosomal_RNA_Alteromonas_macleodii_Ionian_Sea_UM7_CP004853	98.897
IDMED12C_423	ST 8	deep	Alteromonas	NO	NO GENE	NW Mediterranean Sea	NA	2562483368_16S_ribosomal_RNA_Alteromonas_macleodii_Ionian_Sea_UM7_CP004853	99.251
IDMED12C_424	ST 8	deep	Alteromonas	NO	NO GENE	NW Mediterranean Sea	NA	2562483368_16S_ribosomal_RNA_Alteromonas_macleodii_Ionian_Sea_UM7_CP004853	99.25
IDMED12C_425	ST 8	deep	Alteromonas	NO	NO GENE	NW Mediterranean Sea	NA	2562483368_16S_ribosomal_RNA_Alteromonas_macleodii_Ionian_Sea_UM7_CP004853	99.251
IDMED12C_426	ST 8	deep	Alteromonas	NO	NO GENE	NW Mediterranean Sea	NA	2562483368_16S_ribosomal_RNA_Alteromonas_macleodii_Ionian_Sea_UM7_CP004853	98.895
IDMED12C_476	ST 8	deep	Alteromonas	NO	NO GENE	NW Mediterranean Sea	NA	2562483368_16S_ribosomal_RNA_Alteromonas_macleodii_Ionian_Sea_UM7_CP004853	99.244
IDMED12C_480	ST 8	deep	Alteromonas	NO	NO GENE	NW Mediterranean Sea	NA	2562483368_16S_ribosomal_RNA_Alteromonas_macleodii_Ionian_Sea_UM7_CP004853	99.244
IDMED12C_482	ST 8	deep	Alteromonas	NO	NO GENE	NW Mediterranean Sea	NA	2562483368_16S_ribosomal_RNA_Alteromonas_macleodii_Ionian_Sea_UM7_CP004853	99.244
IDMED12C_485	ST 8	deep	Alteromonas	NO	NO GENE	NW Mediterranean Sea	NA	2562483368_16S_ribosomal_RNA_Alteromonas_macleodii_Ionian_Sea_UM7_CP004853	99.244
IDMEDRT_030	ST 8	deep	Alteromonas	NO	NO GENE	NW Mediterranean Sea	NA	2562483368_16S_ribosomal_RNA_Alteromonas_macleodii_Ionian_Sea_UM7_CP004853	99.25
IDMEDRT_033	ST 8	deep	Alteromonas	NO	NO GENE	NW Mediterranean Sea	NA	2562483368_16S_ribosomal_RNA_Alteromonas_macleodii_Ionian_Sea_UM7_CP004853	99.261
IDMEDRT_101	ST 8	deep	Alteromonas	NO	NO GENE	NW Mediterranean Sea	NA	2562483368_16S_ribosomal_RNA_Alteromonas_macleodii_Ionian_Sea_UM7_CP004853	99.25
IDMEDRT_102	ST 8	deep	Alteromonas	NO	NO GENE	NW Mediterranean Sea	NA	2562483368_16S_ribosomal_RNA_Alteromonas_macleodii_Ionian_Sea_UM7_CP004853	99.25
IDMEDRT_112	ST 8	deep	Alteromonas	NO	NO GENE	NW Mediterranean Sea	NA	2562483368_16S_ribosomal_RNA_Alteromonas_macleodii_Ionian_Sea_UM7_CP004853	99.25
IDMEDRT_113	ST 8	deep	Alteromonas	NO	NO GENE	NW Mediterranean Sea	NA	2562483368_16S_ribosomal_RNA_Alteromonas_macleodii_Ionian_Sea_UM7_CP004853	99.077
IDMEDRT_120	ST 8	deep	Alteromonas	NO	NO GENE	NW Mediterranean Sea	NA	2562483368_16S_ribosomal_RNA_Alteromonas_macleodii_Ionian_Sea_UM7_CP004853	99.244
IDMEDRT_147	ST 8	deep	Alteromonas	NO	NO GENE	NW Mediterranean Sea	NA	2562483368_16S_ribosomal_RNA_Alteromonas_macleodii_Ionian_Sea_UM7_CP004853	99.242
IDMEDRT_148	ST 8	deep	Alteromonas	NO	NO GENE	NW Mediterranean Sea	NA	2562483368_16S_ribosomal_RNA_Alteromonas_macleodii_Ionian_Sea_UM7_CP004853	99.25
IDMEDRT_153	ST 8	deep	Alteromonas	NO	NO GENE	NW Mediterranean Sea	NA	2562483368_16S_ribosomal_RNA_Alteromonas_macleodii_Ionian_Sea_UM7_CP004853	99.25
IDMEDRT_154	ST 8	deep	Alteromonas	NO	NO GENE	NW Mediterranean Sea	NA	2562483368_16S_ribosomal_RNA_Alteromonas_macleodii_Ionian_Sea_UM7_CP004853	99.25
IDMEDRT_194	ST 8	deep	Alteromonas	NO	NO GENE	NW Mediterranean Sea	NA	2562483368_16S_ribosomal_RNA_Alteromonas_macleodii_Ionian_Sea_UM7_CP004853	99.25
IDMEDRT_195	ST 8	deep	Alteromonas	NO	NO GENE	NW Mediterranean Sea	NA	2562483368_16S_ribosomal_RNA_Alteromonas_macleodii_Ionian_Sea_UM7_CP004853	99.25
IDMEDRT_220	ST 8	deep	Alteromonas	NO	NO GENE	NW Mediterranean Sea	NA	2562483368_16S_ribosomal_RNA_Alteromonas_macleodii_Ionian_Sea_UM7_CP004853	99.244
IDMEDRT_240	ST 8	deep	Alteromonas	NO	NO GENE	NW Mediterranean Sea	NA	2562483368_16S_ribosomal_RNA_Alteromonas_macleodii_Ionian_Sea_UM7_CP004853	99.244
IDMEDRT_260	ST 8	deep	Alteromonas	NO	NO GENE	NW Mediterranean Sea	NA	2562483368_16S_ribosomal_RNA_Alteromonas_macleodii_Ionian_Sea_UM7_CP004853	99.244
IDMEDRT_451	ST 8	deep	Alteromonas	NO	NO GENE	NW Mediterranean Sea	NA	2562483368_16S_ribosomal_RNA_Alteromonas_macleodii_Ionian_Sea_UM7_CP004853	99.244
IDMEDRT_453	ST 8	deep	Alteromonas	NO	NO GENE	NW Mediterranean Sea	NA	2562483368_16S_ribosomal_RNA_Alteromonas_macleodii_Ionian_Sea_UM7_CP004853	99.251
IDMEDRT_454	ST 8	deep	Alteromonas	NO	NO GENE	NW Mediterranean Sea	NA	2562483368_16S_ribosomal_RNA_Alteromonas_macleodii_Ionian_Sea_UM7_CP004853	98.895
IDMEDRT_455	ST 8	deep	Alteromonas	NO	NO GENE	NW Mediterranean Sea	NA	2562483368_16S_ribosomal_RNA_Alteromonas_macleodii_Ionian_Sea_UM7_CP004853	98.895
IDMEDRT_456	ST 8	deep	Alteromonas	NO	NO GENE	NW Mediterranean Sea	NA	2562483368_16S_ribosomal_RNA_Alteromonas_macleodii_Ionian_Sea_UM7_CP004853	99.25
IDMEDRT_457	ST 8	deep	Alteromonas	NO	NO GENE	NW Mediterranean Sea	NA	2562483368_16S_ribosomal_RNA_Alteromonas_macleodii_Ionian_Sea_UM7_CP004853	99.25
IDMEDRT_458	ST 8	deep	Alteromonas	NO	NO GENE	NW Mediterranean Sea	NA	2562483368_16S_ribosomal_RNA_Alteromonas_macleodii_Ionian_Sea_UM7_CP004853	99.25
IDMEDRT_459	ST 8	deep	Alteromonas	NO	NO GENE	NW Mediterranean Sea	NA	2562483368_16S_ribosomal_RNA_Alteromonas_macleodii_Ionian_Sea_UM7_CP004853	99.251
IDMEDRT_462	ST 8	deep	Alteromonas	NO	NO GENE	NW Mediterranean Sea	NA	2562483368_16S_ribosomal_RNA_Alteromonas_macleodii_Ionian_Sea_UM7_CP004853	99.25
IDMEDRT_469	ST 8	deep	Alteromonas	NO	NO GENE	NW Mediterranean Sea	NA	2562483368_16S_ribosomal_RNA_Alteromonas_macleodii_Ionian_Sea_UM7_CP004853	99.244
IDMEDRT_472	ST 8	deep	Alteromonas	NO	NO GENE	NW Mediterranean Sea	NA	2562483368_16S_ribosomal_RNA_Alteromonas_macleodii_Ionian_Sea_UM7_CP004853	99.242
IDMEDRT_488	ST 8	deep	Alteromonas	NO	NO GENE	NW Mediterranean Sea	NA	2562483368_16S_ribosomal_RNA_Alteromonas_macleodii_Ionian_Sea_UM7_CP004853	99.244
IDMEDRT_490	ST 8	deep	Alteromonas	NO	NO GENE	NW Mediterranean Sea	NA	2562483368_16S_ribosomal_RNA_Alteromonas_macleodii_Ionian_Sea_UM7_CP004853	99.251
IDMEDRT_491	ST 8	deep	Alteromonas	NO	NO GENE	NW Mediterranean Sea	NA	2562483368_16S_ribosomal_RNA_Alteromonas_macleodii_Ionian_Sea_UM7_CP004853	98.113
IDMEDRT_492	ST 8	deep	Alteromonas	NO	NO GENE	NW Mediterranean Sea	NA	2562483368_16S_ribosomal_RNA_Alteromonas_macleodii_Ionian_Sea_UM7_CP004853	99.245
IDMEDRT_493	ST 8	deep	Alteromonas	NO	NO GENE	NW Mediterranean Sea	NA	2562483368_16S_ribosomal_RNA_Alteromonas_macleodii_Ionian_Sea_UM7_CP004853	98.113
IDMEDRT_494	ST 8	deep	Alteromonas	NO	NO GENE	NW Mediterranean Sea	NA	2562483368_16S_ribosomal_RNA_Alteromonas_macleodii_Ionian_Sea_UM7_CP004853	99.25
IDMEDRT_500	ST 8	deep	Alteromonas	NO	NO GENE	NW Mediterranean Sea	NA	2562483368_16S_ribosomal_RNA_Alteromonas_macleodii_Ionian_Sea_UM7_CP004853	99.242
IDMEDRT_515	ST 8	deep	Alteromonas	NO	NO GENE	NW Mediterranean Sea	NA	2562483368_16S_ribosomal_RNA_Alteromonas_macleodii_Ionian_Sea_UM7_CP004853	99.244
IDMEDRT_602	ST 8	deep	Alteromonas	NO	NO GENE	NW Mediterranean Sea	NA	2562483368_16S_ribosomal_RNA_Alteromonas_macleodii_Ionian_Sea_UM7_CP004853	99.244
IDMEDRTRT_080	ST 8	deep	Alteromonas	NO	NO GENE	NW Mediterranean Sea	NA	2562483368_16S_ribosomal_RNA_Alteromonas_macleodii_Ionian_Sea_UM7_CP004853	99.244
IDMEDRTRT_085	ST 8	deep	Alteromonas	NO	NO GENE	NW Mediterranean Sea	NA	2562483368_16S_ribosomal_RNA_Alteromonas_macleodii_Ionian_Sea_UM7_CP004853	99.244
IBSURF_RT_ISS006	IBSURF	srf	Alteromonas	NO	NO GENE	NW Mediterranean Sea	NA	2562485630_16S_ribosomal_RNA_Alteromonas_macleodii_Ionian_Sea_UM7_CP004853	99.811
IBSURF_RT_ISS057	IBSURF	srf	Alteromonas	NO	NO GENE	NW Mediterranean Sea	NA	2562485630_16S_ribosomal_RNA_Alteromonas_macleodii_Ionian_Sea_UM7_CP004853	98.866
IBSURF_RT_ISS059	IBSURF	srf	Alteromonas	NO	NO GENE	NW Mediterranean Sea	NA	2562485630_16S_ribosomal_RNA_Alteromonas_macleodii_Ionian_Sea_UM7_CP004853	99.055
IM324C_ISS251	ST 32	deep	Alteromonas	NO	NO GENE	South Atlantic Ocean	NA	2562483368_16S_ribosomal_RNA_Alteromonas_macleodii_Ionian_Sea_UM7_CP004853	99.625
IM32RT_ISS168	ST 32	deep	Alteromonas	NO	NO GENE	South Atlantic Ocean	NA	2562483368_16S_ribosomal_RNA_Alteromonas_macleodii_Ionian_Sea_UM7_CP004853	98.687
IM32RT_ISS170	ST 32	deep	Alteromonas	NO	NO GENE	South Atlantic Ocean	NA	2562483368_16S_ribosomal_RNA_Alteromonas_macleodii_Ionian_Sea_UM7_CP004853	99.245
IM32RT_ISS198	ST 32	deep	Alteromonas	NO	NO GENE	South Atlantic Ocean	NA	2562483368_16S_ribosomal_RNA_Alteromonas_macleodii_Ionian_Sea_UM7_CP004853	99.25
IM32RT_ISS200	ST 32	deep	Alteromonas	NO	NO GENE	South Atlantic Ocean	NA	2562483368_16S_ribosomal_RNA_Alteromonas_macleodii_Ionian_Sea_UM7_CP004853	99.625
IM32RT_ISS201	ST 32	deep	Alteromonas	NO	NO GENE	South Atlantic Ocean	NA	2562483368_16S_ribosomal_RNA_Alteromonas_macleodii_Ionian_Sea_UM7_CP004853	99.625
ST17RT_ISS_793	ST 17	deep	Alteromonas	NO	NO GENE	South Atlantic Ocean	NA	2562483368_16S_ribosomal_RNA_Alteromonas_macleodii_Ionian_Sea_UM7_CP004853	99.248
ST23RT_ISS_697	ST 23	deep	Alteromonas	NO	NO GENE	South Atlantic Ocean	NA	2562483368_16S_ribosomal_RNA_Alteromonas_macleodii_Ionian_Sea_UM7_CP004853	99.245
ST23RT_ISS_714	ST 23	deep	Alteromonas	NO	NO GENE	South Atlantic Ocean	NA	2562483368_16S_ribosomal_RNA_Alteromonas_macleodii_Ionian_Sea_UM7_CP004853	99.25
ST23RT_ISS_715	ST 23	deep	Alteromonas	NO	NO GENE	South Atlantic Ocean	NA	2562483368_16S_ribosomal_RNA_Alteromonas_macleodii_Ionian_Sea_UM7_CP004853	99.25
ST23RT_ISS_717	ST 23	deep	Alteromonas	NO	NO GENE	South Atlantic Ocean	NA	2562482999_16S_ribosomal_RNA_Alteromonas_macleodii_Ionian_Sea_UM7_CP004853	100
ST23RT_ISS_718	ST 23	deep	Alteromonas	NO	NO GENE	South Atlantic Ocean	NA	2562483368_16S_ribosomal_RNA_Alteromonas_macleodii_Ionian_Sea_UM7_CP004853	99.812
ST23RT_ISS_720	ST 23	deep	Alteromonas	NO	NO GENE	South Atlantic Ocean	NA	2562483368_16S_ribosomal_RNA_Alteromonas_macleodii_Ionian_Sea_UM7_CP004853	99.25
ST23RT_ISS_724	ST 23	deep	Alteromonas	NO	NO GENE	South Atlantic Ocean	NA	2562483368_16S_ribosomal_RNA_Alteromonas_macleodii_Ionian_Sea_UM7_CP004853	99.25
ST67RT_ISS_1219	ST 67	srf	Alteromonas	NO	NO GENE	South Atlantic Ocean	NA	2562483368_16S_ribosomal_RNA_Alteromonas_macleodii_Ionian_Sea_UM7_CP004853	99.25
ST67RT_ISS_1221	ST 67	srf	Alteromonas	NO	NO GENE	South Atlantic Ocean	NA	2562483368_16S_ribosomal_RNA_Alteromonas_macleodii_Ionian_Sea_UM7_CP004853	99.25
ST67RT_ISS_1227	ST 67	srf	Alteromonas	NO	NO GENE	South Atlantic Ocean	NA	2562483368_16S_ribosomal_RNA_Alteromonas_macleodii_Ionian_Sea_UM7_CP004853	99.245
ST67RT_ISS_1230	ST 67	srf	Alteromonas	NO	NO GENE	South Atlantic Ocean	NA	2562483368_16S_ribosomal_RNA_Alteromonas_macleodii_Ionian_Sea_UM7_CP004853	99.25
ST67RT_ISS_1232	ST 67	srf	Alteromonas	NO	NO GENE	South Atlantic Ocean	NA	2562483368_16S_ribosomal_RNA_Alteromonas_macleodii_Ionian_Sea_UM7_CP004853	99.25
ST67RT_ISS_1236	ST 67	srf	Alteromonas	NO	NO GENE	South Atlantic Ocean	NA	2562483368_16S_ribosomal_RNA_Alteromonas_macleodii_Ionian_Sea_UM7_CP004853	99.25
ST67RT_ISS_1243	ST 67	srf	Alteromonas	NO	NO GENE	South Atlantic Ocean	NA	2562483368_16S_ribosomal_RNA_Alteromonas_macleodii_Ionian_Sea_UM7_CP004853	99.248
ST67RT_ISS_1258	ST 67	srf	Alteromonas	NO	NO GENE	South Atlantic Ocean	NA	2562483368_16S_ribosomal_RNA_Alteromonas_macleodii_Ionian_Sea_UM7_CP004853	99.25
ST67RT_ISS_1328	ST 67	srf	Alteromonas	NO	NO GENE	South Atlantic Ocean	NA	2562483368_16S_ribosomal_RNA_Alteromonas_macleodii_Ionian_Sea_UM7_CP004853	99.25
ST72RT_ISS_539	ST 72	srf	Alteromonas	NO	NO GENE	South Atlantic Ocean	NA	2562483368_16S_ribosomal_RNA_Alteromonas_macleodii_Ionian_Sea_UM7_CP004853	99.812
ST72RT_ISS_540	ST 72	srf	Alteromonas	NO	NO GENE	South Atlantic Ocean	NA	2562483368_16S_ribosomal_RNA_Alteromonas_macleodii_Ionian_Sea_UM7_CP004853	99.247
ST72RT_ISS_543	ST 72	srf	Alteromonas	NO	NO GENE	South Atlantic Ocean	NA	2562483368_16S_ribosomal_RNA_Alteromonas_macleodii_Ionian_Sea_UM7_CP004853	99.247
ST72RT_ISS_596	ST 72	srf	Alteromonas	NO	NO GENE	South Atlantic Ocean	NA	2562483368_16S_ribosomal_RNA_Alteromonas_macleodii_Ionian_Sea_UM7_CP004853	98.493
ST72RT_ISS_599	ST 72	srf	Alteromonas	NO	NO GENE	South Atlantic Ocean	NA	2562483368_16S_ribosomal_RNA_Alteromonas_macleodii_Ionian_Sea_UM7_CP004853	98.305
ST72RT_ISS_600	ST 72	srf	Alteromonas	NO	NO GENE	South Atlantic Ocean	NA	2562483368_16S_ribosomal_RNA_Alteromonas_macleodii_Ionian_Sea_UM7_CP004853	98.302
ST72RT_ISS_602	ST 72	srf	Alteromonas	NO	NO GENE	South Atlantic Ocean	NA	2562483368_16S_ribosomal_RNA_Alteromonas_macleodii_Ionian_Sea_UM7_CP004853	99.247
ST72RT_ISS_603	ST 72	srf	Alteromonas	NO	NO GENE	South Atlantic Ocean	NA	MK801637.1_Aestuariibacter sp. strain 075	100
ST72RT_ISS_604	ST 72	srf	Alteromonas	NO	NO GENE	South Atlantic Ocean	NA	MK801637.1_Aestuariibacter sp. strain 075	100
ST72RT_ISS_672	ST 72	srf	Alteromonas	NO	NO GENE	South Atlantic Ocean	NA	2562483368_16S_ribosomal_RNA_Alteromonas_macleodii_Ionian_Sea_UM7_CP004853	100
ST76RT_ISS_1147	ST 76	srf	Alteromonas	NO	NO GENE	South Atlantic Ocean	NA	2562483368_16S_ribosomal_RNA_Alteromonas_macleodii_Ionian_Sea_UM7_CP004853	98.687
ST76RT_ISS_1148	ST 76	srf	Alteromonas	NO	NO GENE	South Atlantic Ocean	NA	2562483368_16S_ribosomal_RNA_Alteromonas_macleodii_Ionian_Sea_UM7_CP004853	98.687
ST76RT_ISS_1150	ST 76	srf	Alteromonas	NO	NO GENE	South Atlantic Ocean	NA	2562483368_16S_ribosomal_RNA_Alteromonas_macleodii_Ionian_Sea_UM7_CP004853	98.684
ST76RT_ISS_1156	ST 76	srf	Alteromonas	NO	NO GENE	South Atlantic Ocean	NA	2562483368_16S_ribosomal_RNA_Alteromonas_macleodii_Ionian_Sea_UM7_CP004853	99.25
ST76RT_ISS_1157	ST 76	srf	Alteromonas	NO	NO GENE	South Atlantic Ocean	NA	2562483368_16S_ribosomal_RNA_Alteromonas_macleodii_Ionian_Sea_UM7_CP004853	98.684
ST76RT_ISS_1158	ST 76	srf	Alteromonas	NO	NO GENE	South Atlantic Ocean	NA	2562483368_16S_ribosomal_RNA_Alteromonas_macleodii_Ionian_Sea_UM7_CP004853	98.687
ST76RT_ISS_1159	ST 76	srf	Alteromonas	NO	NO GENE	South Atlantic Ocean	NA	2562483368_16S_ribosomal_RNA_Alteromonas_macleodii_Ionian_Sea_UM7_CP004853	99.25
ST76RT_ISS_1160	ST 76	srf	Alteromonas	NO	NO GENE	South Atlantic Ocean	NA	2562483368_16S_ribosomal_RNA_Alteromonas_macleodii_Ionian_Sea_UM7_CP004853	98.679
ST76RT_ISS_1352	ST 76	srf	Alteromonas	NO	NO GENE	South Atlantic Ocean	NA	2562483368_16S_ribosomal_RNA_Alteromonas_macleodii_Ionian_Sea_UM7_CP004853	98.687
ST76RT_ISS_1353	ST 76	srf	Alteromonas	NO	NO GENE	South Atlantic Ocean	NA	2562483368_16S_ribosomal_RNA_Alteromonas_macleodii_Ionian_Sea_UM7_CP004853	98.684
ST76RT_ISS_1355	ST 76	srf	Alteromonas	NO	NO GENE	South Atlantic Ocean	NA	2562483368_16S_ribosomal_RNA_Alteromonas_macleodii_Ionian_Sea_UM7_CP004853	98.687
ST76RT_ISS_1356	ST 76	srf	Alteromonas	NO	NO GENE	South Atlantic Ocean	NA	2562483368_16S_ribosomal_RNA_Alteromonas_macleodii_Ionian_Sea_UM7_CP004853	98.687
ST76RT_ISS_1357	ST 76	srf	Alteromonas	NO	NO GENE	South Atlantic Ocean	NA	2562483368_16S_ribosomal_RNA_Alteromonas_macleodii_Ionian_Sea_UM7_CP004853	98.687
ST76RT_ISS_1358	ST 76	srf	Alteromonas	NO	NO GENE	South Atlantic Ocean	NA	2562483368_16S_ribosomal_RNA_Alteromonas_macleodii_Ionian_Sea_UM7_CP004853	99.812
ST76RT_ISS_1171	ST 76	srf	Marinobacter	NO	NO GENE	South Atlantic Ocean	NA	2540829979_ribosomal_RNA_16S_Marinobacter_hydrocarbonoclasticus_ATCC_49840_FO203363	100
ST39DCMRT_242	ST 39	srf	Alteromonas	NO	NO GENE	Indian Ocean	NA	MH731668.1_Alteromonas sp. strain VT18	100
							* colored cells were strains tested during revisions of the paper

## Sheet: s3
Cruise	Station	Oceanic location	Latitude	Longitude	Depth (m)	Nº of screened isolates	Nº of merA positive	Nº of merAB positives
Tara Oceans	ST 39	Indian Ocean	18º 35.2’ N	66º 28.22’ E	25	44	0	1
	ST 67	South Atlantic	32º 17.31’ S	17º 12.22’ E	5	20	11	6
	ST 72	South Atlantic	8º 46.44’ S	17º 54.36’ W	5	15	4	2
	ST 76	South Atlantic	20º 56.7’ S	35º 10.49’ W	5	31	15	8
	ST 85	Southern Ocean	62º 2.19’ S	49º 31.44’ W	5.9	1	1	0
	ST 85	Southern Ocean	62º 2.19’ S	49º 31.44’ W	87.4	6	4	4
	ST 151	North Atlantic	36º 10.17’ N	29º 1.23’ W	5	31	6	0
ATP09	AR_1	Arctic Ocean	78º 20.00’ N	15º 00.00’ E	2	3	0	0
	AR_2	Arctic Ocean	76º 28.65’ N	28º 00.62’ E	25	4	0	0
Malaspina	ST 10	North Atlantic	21º 33.36’ N	23º26’ W	4002	11	1	0
	ST 17	South Atlantic	3º 1.48’ S	27º 19.48’ W	4002	3	2	0
	ST 23	South Atlantic	15º 49.48’ S	33º 24.36’ W	4003	13	5	0
	ST 32	South Atlantic	26º 56.8’ S	21º 24’ W	3200	14	7	0
	ST 33	South Atlantic	27º 33.2’ S	18º 5.4’ W	3904	2	2	2
	ST 43	South Atlantic	32º 48.8’ S	12º 46.2’ E	4000	3	3	2
MIFASOL	ST 8	NW Mediterranean	40º 38.41’ N	2º 50’ E	2000	84	9	2
BBMO	IBSURF	NW Mediterranean	41º 40’ N	2º 48’ E	5	5	2	0

## Sheet: s4
	Alteromonas		Marinobacter
	+	-	+	-	TOTAL +	% POSITIVES
Southern Ocean	1	1	4	1	5	71.4286
Arctic Ocean	0	7	0	0	0	0
Indian Ocean	1	43	0	0	1	2.27273
NW Mediterranean	2	80	10	0	12	13.0435
North Atlantic Ocean	7	33	0	1	7	17.0732
South Atlantic Ocean	22	50	27	3	48	47.5248
**Note
+	include both merA and/or merAB PCR positive results
-	include both merA and/or merAB negative results

## Sheet: s5
Genus	MIC (µM)	Nº of strains (%)
Alteromonas sp.	10	4 (12.5%)
	20	18 (56.3%)
	25	2 (6.3%)
	50	7 (21.9%)
	70	1 (3.2%)
Marinobacter sp.	5	1 (2.5%)
	10	6 (15%)
	20	22 (55%)
	25	1(2.5%)
	50	10 (25%)

## Sheet: s6
CULTURE ISS312
Incubation		Concentration of MeHg				Concentration of inorganic Hg				% MeHg degraded
MeHg (µM)	Time (h)	MeHg (µg/L)	SD	MeHg (µM)	SD	IHg (µg/L)	SD	IHg (µM)	SD
1	0	103.774	0.536037	0.481349	0.00248637	13.5092	0.311964	0.0673474	0.00155523	0
	6	12.1957	0.519396	0.0565691	0.00240919	<LOD		<LOD		88.2478
	12	9.4056	0.209118	0.0436272	0.00096998	<LOD		<LOD		90.9365
	24	4.87105	0.32632	0.0225941	0.00151361	<LOD		<LOD		95.3061
	36	3.1989	0.0811077	0.0148379	0.000376213	<LOD		<LOD		96.9174
	48	<LOD		<LOD		2.92128	0.252121	0.0145634	0.0012569	--
5	0	862.579	22.0987	4.00102	0.102503	<LOD		<LOD		0
	6	553.265	17.4002	2.56628	0.0807099	<LOD		<LOD		35.8592
	12	244.265	5.87578	1.13301	0.0272544	<LOD		<LOD		71.682
	24	15.5724	0.260508	0.0722317	0.00120835	27.3958	0.112799	0.136576	0.000562334	98.1947
	36	7.01054	0.867716	0.0325179	0.00402485	16.8115	0.450521	0.0838101	0.00224598	99.1873
	48	<LOD		<LOD		5.85304	0.64041	0.0291791	0.00319263	--
				*LOD (µM)	0.000185537			*LOD (µM)	0.000231922

## Sheet: s7
Sample	Time (h)	MeHg (µM)	SD	Mercury Removal (%)
Culture	0	3.73	0.21	1
	72	<LOD	<LOD
Killed control	0	3.91	0.18	0.248
	72	2.94	0.16
Medium control	0	3.54	0.05	0.2515
	72	2.65	0.15

## Sheet: s8
Gene	Gene_ID_gene_atlas_catalog	taxonomy
merA homologous	OM-RGC.v2.001402479	Biota;Bacteria
	OM-RGC.v2.001443177	Biota;
	OM-RGC.v2.001452871	Biota;Bacteria
	OM-RGC.v2.001454961	Biota;Bacteria
	OM-RGC.v2.001459350	Biota;Bacteria
	OM-RGC.v2.001490540	Biota;Bacteria
	OM-RGC.v2.001492381	Biota;Bacteria
	OM-RGC.v2.001496146	Biota;Bacteria
	OM-RGC.v2.001505679	Biota;Bacteria;Proteobacteria;Betaproteobacteria
	OM-RGC.v2.001506514	Biota;Bacteria;Proteobacteria
	OM-RGC.v2.001509873	Biota;Bacteria
	OM-RGC.v2.001512242	Biota;Bacteria;Proteobacteria
	OM-RGC.v2.001515105	Biota;Bacteria
	OM-RGC.v2.001516009	Biota;Bacteria
	OM-RGC.v2.001516132	Biota;
	OM-RGC.v2.001516385	Biota;Bacteria;Proteobacteria
	OM-RGC.v2.001516848	Biota;
	OM-RGC.v2.001519060	Biota;Bacteria;Proteobacteria
	OM-RGC.v2.001523923	Biota;Bacteria;Proteobacteria;Gammaproteobacteria;Pseudomonadales;Pseudomonadaceae;Pseudomonas
	OM-RGC.v2.001614017	Biota;Bacteria;Proteobacteria;Gammaproteobacteria
	OM-RGC.v2.001625301	Biota;
	OM-RGC.v2.001659515	Biota;Bacteria
	OM-RGC.v2.001664001	Biota;Bacteria;Proteobacteria;Gammaproteobacteria;Oceanospirillales;Halomonadaceae;Halomonas
	OM-RGC.v2.001984120	Biota;Bacteria
	OM-RGC.v2.002292273	Biota;Bacteria;Proteobacteria
	OM-RGC.v2.002488624	Biota;Bacteria;Proteobacteria
	OM-RGC.v2.002524951	Biota;Bacteria;Proteobacteria;Gammaproteobacteria;Alteromonadales;Alteromonadaceae;Marinobacter
	OM-RGC.v2.002568501	Biota;
	OM-RGC.v2.002575901	Biota;Bacteria;Proteobacteria;Gammaproteobacteria
	OM-RGC.v2.002578425	Biota;Bacteria
	OM-RGC.v2.002580194	Biota;Bacteria;Proteobacteria;Gammaproteobacteria;Alteromonadales;Alteromonadaceae;Marinobacter
	OM-RGC.v2.002581529	Biota;Bacteria;Proteobacteria;Gammaproteobacteria;unclassifiedGammaproteobacteria
	OM-RGC.v2.002586446	Biota;Bacteria
	OM-RGC.v2.002587824	Biota;Bacteria
	OM-RGC.v2.002589577	Biota;Bacteria;Proteobacteria;Gammaproteobacteria
	OM-RGC.v2.002591348	Biota;Bacteria;Proteobacteria;Gammaproteobacteria;unclassifiedGammaproteobacteria
	OM-RGC.v2.002592432	Biota;Bacteria;Proteobacteria;Gammaproteobacteria;Alteromonadales;Alteromonadaceae;Marinobacter
	OM-RGC.v2.002595741	Biota;Bacteria;Proteobacteria;Gammaproteobacteria;Alteromonadales;Idiomarinaceae;Idiomarina;Idiomarina-sp.28-8
	OM-RGC.v2.002595744	Biota;
	OM-RGC.v2.002595752	Biota;Bacteria
	OM-RGC.v2.002595908	Biota;Bacteria;Proteobacteria;Gammaproteobacteria
	OM-RGC.v2.002596866	Biota;
	OM-RGC.v2.002599094	Biota;Bacteria;Proteobacteria;Gammaproteobacteria
	OM-RGC.v2.002604253	Biota;Bacteria;Proteobacteria;Gammaproteobacteria;Alteromonadales;Alteromonadaceae;Marinobacter;Marinobacterlutaoensis
	OM-RGC.v2.002607250	Biota;
	OM-RGC.v2.002613021	Biota;Bacteria;Proteobacteria;Gammaproteobacteria
	OM-RGC.v2.002965761	Biota;Bacteria; Proteobacteria;Gammaproteobacteria;Oceanospirillales;Halomonadaceae
	OM-RGC.v2.003234810	Biota;Bacteria
	OM-RGC.v2.003290568	Biota;Bacteria;Proteobacteria;Gammaproteobacteria
	OM-RGC.v2.003373733	Biota;
	OM-RGC.v2.005734328	Biota;
	OM-RGC.v2.001527897	Biota;Bacteria; Proteobacteria;Gammaproteobacteria;Xanthomonadales;Xanthomonadaceae;Arenimonas
	OM-RGC.v2.002435400	Biota;Bacteria; Proteobacteria
	OM-RGC.v2.002608360	Biota;
merB homologous	OM-RGC.v2.017073994	Biota;
	OM-RGC.v2.017084235	Biota; Bacteria; Proteobacteria; Gammaproteobacteria
	OM-RGC.v2.017188932	Biota;
	OM-RGC.v2.017606450	Biota;
	OM-RGC.v2.017713104	Biota; Bacteria; Proteobacteria; Gammaproteobacteria; Oceanospirillales; Halomonadaceae; Halomonas
	OM-RGC.v2.017812456	Biota;

## Sheet: s9
Genera detected from preliminary search
Alteromonas sp.
Bacillus sp.
Citrobacter sp.
Halomonas sp.
Hyphomonas sp.
Idiomarina sp.
Kangiella sp.
Maricaulis sp.
Marinobacter sp.
Micrococcus sp.
Nocardioides sp.
Phaeobacter sp.
Pseudomonas sp.
Shewanella sp.
Sphingobium sp.
Sphingomonas sp.
Sphingopyxis sp.
Spongiibacter sp.
Vibrio sp.
Zunongwangia sp.

## Sheet: s10
Genus	Nº of isolates	Putative genes
Alteromonas sp.	247	merA+merB
Marinobacter sp.	79	merA+merB
Idiomarina sp.	9	merA
Pseudomonas sp.	7	merA
Micrococcus sp.	2	merA
Zunongwangia sp.	7	merB
Bacillus sp.	1	merA
